# Supplementary material
Source: PubMed Central journal article supplement (PMC3780873)
Supplement: 1310642110_pnas.201310642SI.pdf [file 1310642110_pnas.201310642SI.pdf]

# Supporting Information

Peil et al. 10.1073/pnas.1310642110

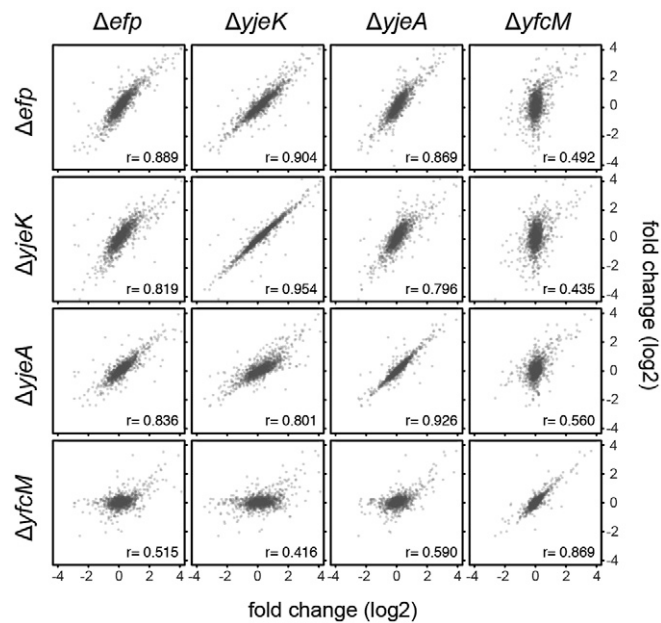

**Fig. S1.** Correlation for biological replicates of proteomics data from  $\Delta efp$ ,  $\Delta yjeK$ ,  $\Delta yjeA$ , and  $\Delta yfcM$  strains. Scatter plots showing correlation of inverted normalized heavy/light (H/L) ratios (log<sub>2</sub>-transformed) for biological replicates of SILAC (stable isotope labeling by amino acids in cell culture) data from the  $\Delta efp$ ,  $\Delta yjeK$ ,  $\Delta yjeA$ , and  $\Delta yfcM$  strains.

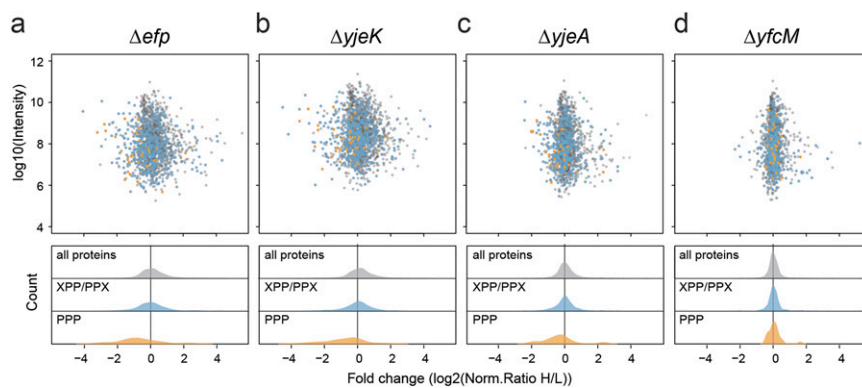

**Fig. S2.** Scatter plots of proteomics data from replicate 2 of  $\Delta efp$ ,  $\Delta yjeK$ ,  $\Delta yjeA$ , and  $\Delta yfcM$  strains. (A–D) Scatter plots of inverted normalized H/L ratios (log<sub>2</sub>-transformed) relative to the summed up protein intensity for a biological replicate of SILAC data from the  $\Delta efp$  (A),  $\Delta yjeK$  (B),  $\Delta yjeA$  (C), and  $\Delta yfcM$  (D) strains, including density plots showing distributions of PPP-containing (gold) and XPP/PPX-containing (blue) proteins relative to all proteins (gray).



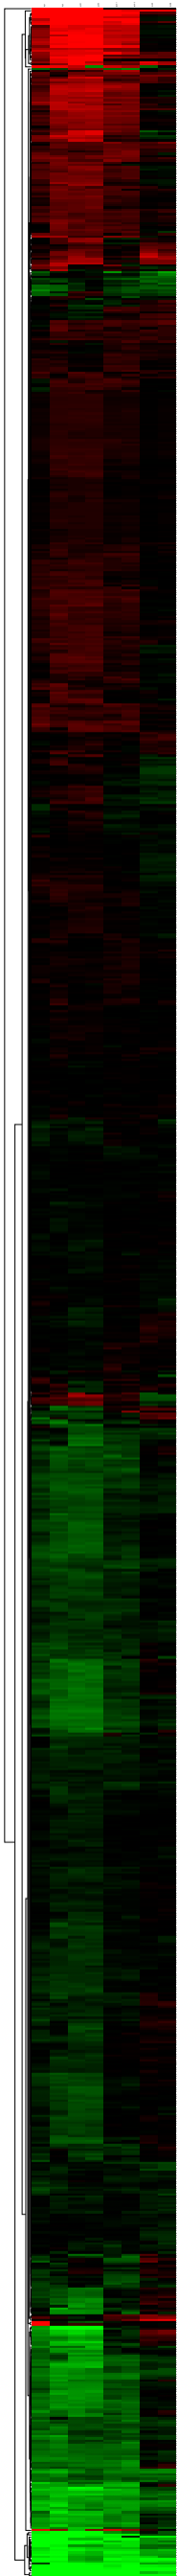

**Fig. S4.** Hierarchical clustering of complete proteomics data from  $\Delta efp$ ,  $\Delta yjeK$ ,  $\Delta yjeA$ , and  $\Delta yfcM$  strains. Heat map representation of hierarchical clustering of all proteins that are up-regulated (red) and down-regulated (blue) in the biological replicates of  $\Delta efp$ ,  $\Delta yjeK$ ,  $\Delta yjeA$ , and  $\Delta yfcM$  strains relative to wild-type strain.

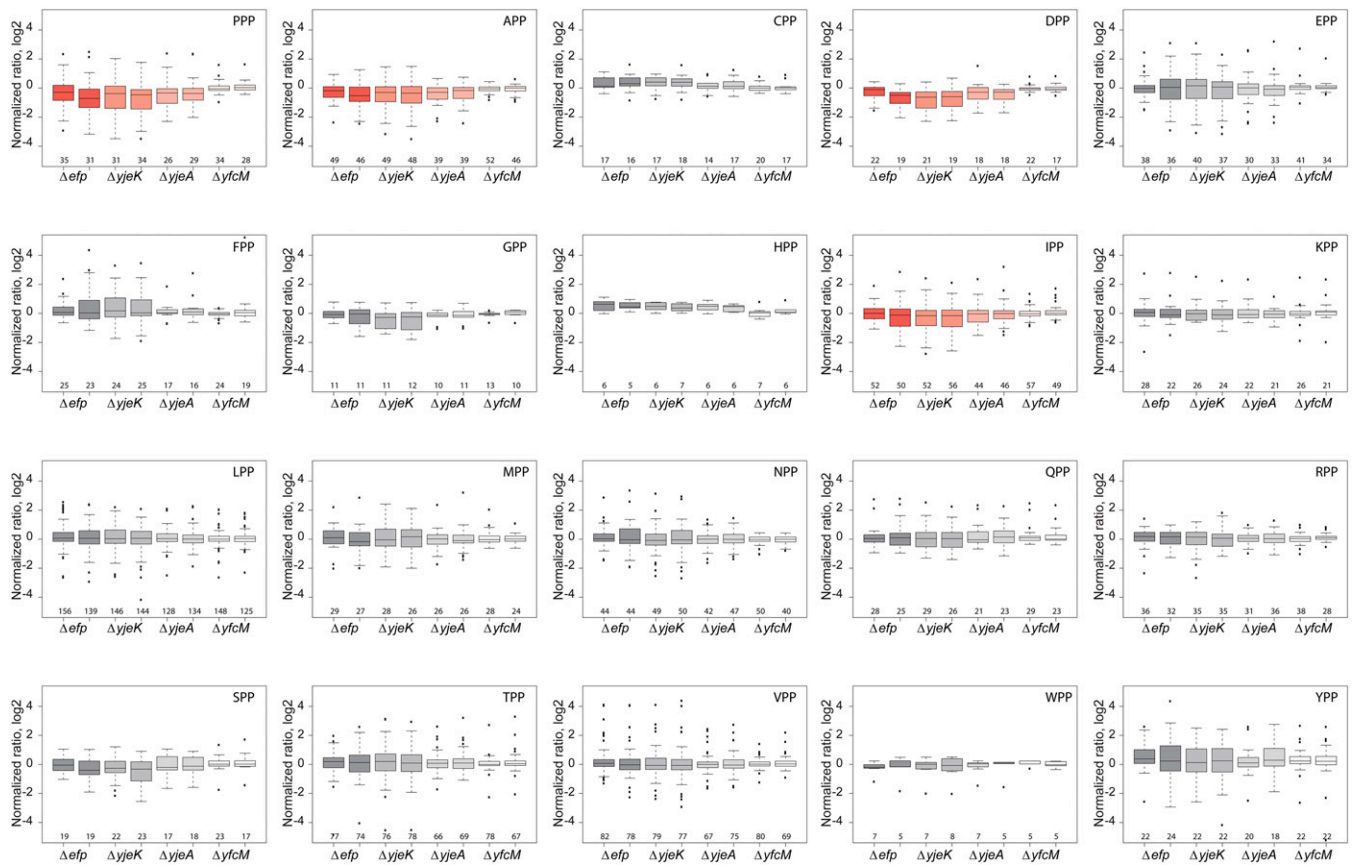

Fig. S5. Box plot representations of inverted normalized H/L ratios ( $\log_2$ -transformed) for proteins containing XPP motifs for  $\Delta efp$ ,  $\Delta yjeK$ ,  $\Delta yjeA$ , and  $\Delta yfcM$  strains.



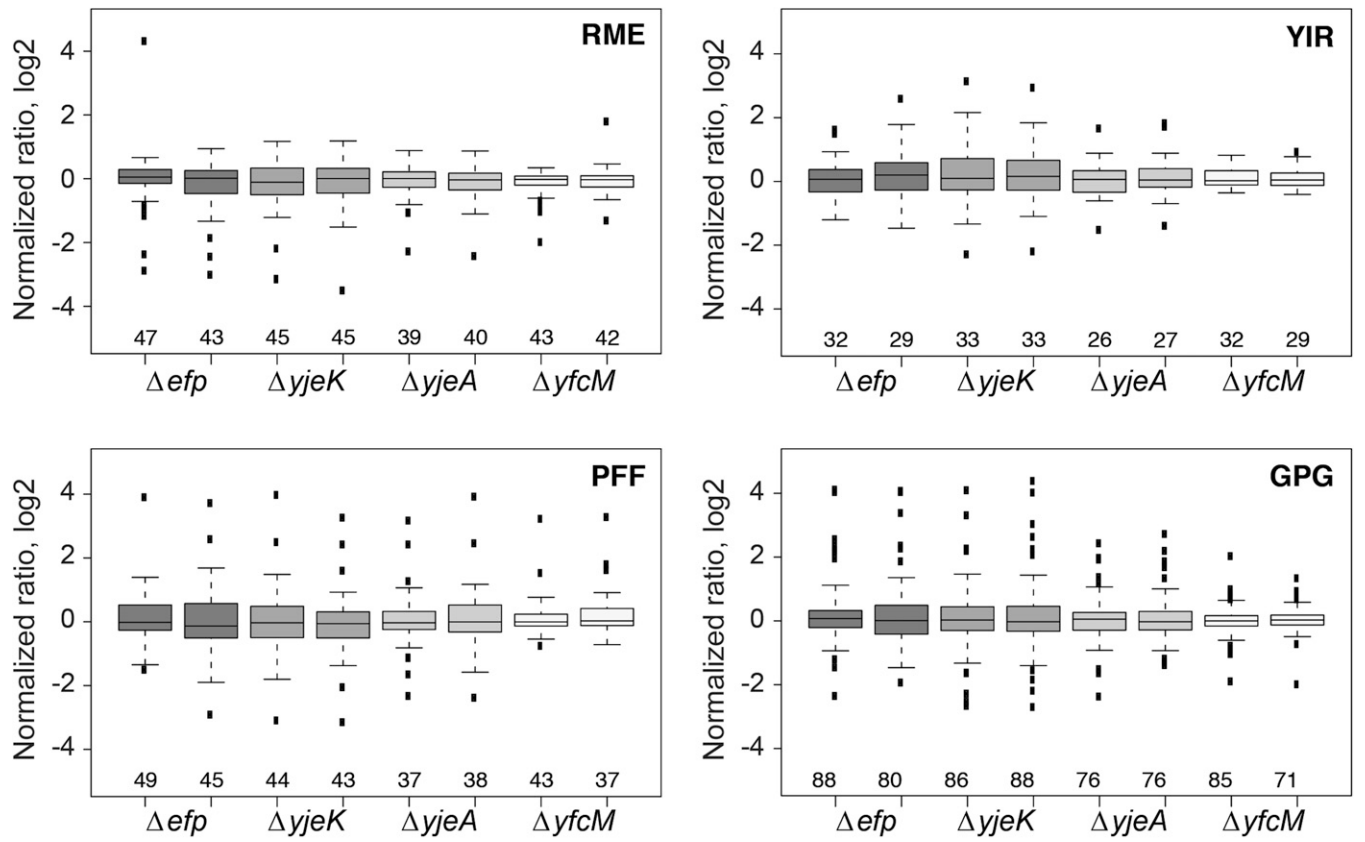

Fig. 57. Box plot representations of inverted normalized H/L ratios (log<sub>2</sub>-transformed) for proteins containing RME, YIR, PFF, and GPG motifs for  $\Delta efp$ ,  $\Delta yjeK$ ,  $\Delta yjeA$ , and  $\Delta yfcM$  strains.

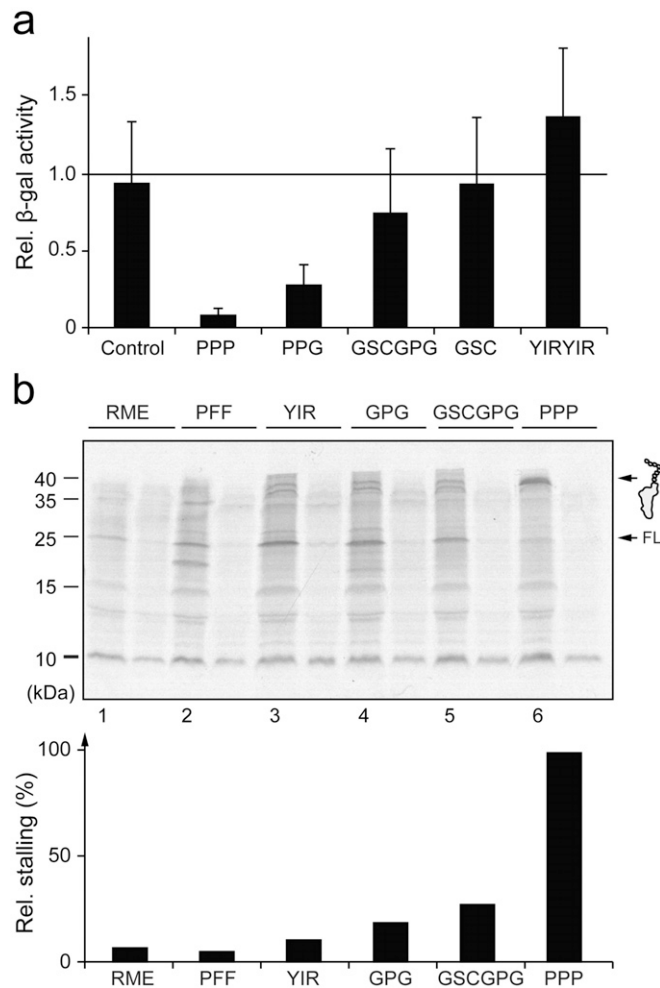

**Fig. S8.** Translation of non-XPPX motifs in the absence of elongation factor P (EF-P). (A)  $\beta$ -galactosidase activities (normalized in wild-type *Escherichia coli* strains relative to  $\Delta efp$  strain) of LacZ constructs containing control (no stalling motif), PPP, or PPG, compared with LacZ constructs containing YIRYIR or PoxB motifs GSCGPG or GSC. (B) Autoradiographs of SDS-polyacrylamide gels indicating [ $^{35}$ S]Met-labeled in vitro translation of reporters containing (lanes 1–6) RME, PFF, YIR, GPG, GSCGPG compared with PPP. Reactions were performed in the absence (–) of active EF-P. Expected peptidyl-tRNA and full-length (FL) product sizes are indicated. The bar graph presents the relative stalling, which is calculated as the amount of stalled peptidyl-tRNA product/(stall + FL product). All relative stalling values are presented relative to that determined for PPP, which was assigned as 100%.

**Table S1. Kruskal–Wallis significance for protein ratio distribution differences between the motif subsets and complete dataset**

| Motif          | efp-1    | efp-2    | yjeK-1   | yjeK-2   | yjeA-1   | yjeA-2   | yfcM-1   | yfcM-2   |
|----------------|----------|----------|----------|----------|----------|----------|----------|----------|
| PPP            | 1.31E-04 | 1.80E-06 | 7.37E-05 | 5.70E-08 | 2.81E-05 | 1.08E-04 | 3.98E-01 | 9.78E-01 |
| APP            | 3.31E-06 | 1.94E-08 | 9.03E-08 | 2.99E-07 | 5.71E-06 | 8.24E-05 | 2.02E-02 | 5.76E-02 |
| CPP            | 1.64E-01 | 1.26E-01 | 1.98E-01 | 9.46E-02 | 3.32E-01 | 3.12E-01 | 8.68E-01 | 5.63E-01 |
| DPP            | 1.03E-03 | 1.03E-06 | 1.76E-07 | 2.37E-06 | 8.33E-04 | 2.96E-04 | 1.03E-01 | 3.01E-01 |
| EPP            | 3.04E-02 | 1.93E-01 | 2.81E-01 | 1.24E-01 | 3.91E-01 | 5.81E-02 | 7.00E-01 | 5.91E-01 |
| FPP            | 8.91E-01 | 9.71E-01 | 5.59E-01 | 6.53E-01 | 6.58E-01 | 4.52E-01 | 1.53E-01 | 9.89E-01 |
| GPP            | 1.77E-01 | 1.64E-01 | 7.87E-03 | 7.55E-03 | 9.49E-02 | 1.63E-01 | 2.55E-01 | 8.24E-01 |
| HPP            | 3.65E-02 | 1.16E-01 | 1.88E-01 | 2.08E-01 | 2.33E-02 | 3.83E-02 | 7.05E-01 | 2.23E-01 |
| IPP            | 3.85E-02 | 8.82E-04 | 4.19E-05 | 3.92E-05 | 1.64E-02 | 4.01E-02 | 1.32E-01 | 6.38E-01 |
| KPP            | 2.31E-01 | 2.05E-01 | 3.49E-02 | 6.41E-02 | 3.71E-01 | 1.69E-01 | 6.86E-01 | 6.75E-01 |
| LPP            | 9.09E-01 | 5.05E-01 | 1.88E-01 | 1.04E-01 | 7.22E-01 | 2.85E-01 | 5.83E-01 | 6.77E-01 |
| MPP            | 8.03E-01 | 1.53E-01 | 4.62E-01 | 7.37E-01 | 4.98E-01 | 2.54E-01 | 6.00E-01 | 9.15E-01 |
| NPP            | 5.43E-01 | 5.86E-01 | 3.19E-02 | 2.31E-01 | 3.52E-01 | 5.09E-01 | 2.37E-01 | 1.80E-01 |
| QPP            | 5.30E-01 | 4.84E-01 | 3.04E-01 | 3.57E-01 | 9.53E-01 | 4.29E-01 | 4.44E-01 | 5.68E-01 |
| RPP            | 6.73E-01 | 9.20E-01 | 3.23E-01 | 2.37E-01 | 8.33E-01 | 6.17E-01 | 7.97E-01 | 1.48E-01 |
| SPP            | 2.35E-01 | 7.09E-03 | 1.22E-02 | 1.69E-03 | 2.15E-01 | 3.54E-01 | 7.86E-01 | 7.16E-01 |
| TPP            | 8.06E-01 | 6.78E-01 | 8.13E-01 | 4.88E-01 | 9.96E-01 | 6.61E-01 | 7.30E-01 | 1.95E-01 |
| VPP            | 6.27E-01 | 7.82E-02 | 1.75E-02 | 1.09E-02 | 1.82E-01 | 2.65E-01 | 8.77E-01 | 7.57E-01 |
| WPP            | 5.30E-02 | 4.22E-01 | 1.99E-01 | 2.87E-01 | 4.95E-01 | 7.41E-01 | 6.48E-01 | 7.70E-01 |
| YPP            | 2.54E-02 | 4.68E-01 | 8.08E-01 | 7.24E-01 | 5.61E-01 | 1.46E-01 | 5.54E-03 | 2.65E-02 |
| PPA            | 6.12E-01 | 1.84E-01 | 5.72E-02 | 6.37E-02 | 3.54E-01 | 7.63E-01 | 3.24E-01 | 9.70E-01 |
| PPC            | 9.98E-01 | 3.42E-01 | 7.57E-01 | 5.93E-01 | 2.87E-01 | 4.64E-01 | 3.06E-01 | 8.77E-01 |
| PPD            | 5.83E-01 | 6.67E-01 | 2.95E-01 | 2.09E-01 | 7.05E-01 | 4.10E-01 | 1.64E-01 | 4.41E-02 |
| PPE            | 3.36E-01 | 2.22E-02 | 7.82E-02 | 1.51E-01 | 1.32E-01 | 4.84E-02 | 2.96E-01 | 8.68E-01 |
| PPF            | 3.56E-02 | 3.41E-01 | 3.89E-01 | 2.22E-01 | 1.42E-01 | 1.45E-01 | 8.43E-01 | 6.54E-01 |
| PPG            | 3.71E-03 | 8.62E-07 | 1.80E-08 | 1.03E-08 | 7.12E-04 | 1.60E-04 | 6.33E-01 | 2.11E-01 |
| PPH            | 1.10E-01 | 4.75E-01 | 6.22E-01 | 3.60E-01 | 8.10E-01 | 7.15E-01 | 4.51E-01 | 2.53E-01 |
| PPI            | 9.70E-01 | 7.50E-01 | 4.09E-01 | 3.81E-01 | 5.24E-01 | 9.99E-01 | 3.89E-01 | 1.33E-01 |
| PPK            | 1.28E-01 | 1.14E-01 | 1.02E-02 | 3.98E-03 | 1.60E-01 | 7.25E-03 | 9.92E-01 | 7.19E-01 |
| PPL            | 2.84E-01 | 2.40E-01 | 2.37E-02 | 5.17E-02 | 4.27E-01 | 6.96E-01 | 9.91E-02 | 3.29E-01 |
| PPM            | 3.25E-01 | 4.99E-02 | 9.07E-02 | 3.46E-02 | 1.72E-01 | 1.18E-01 | 4.56E-01 | 4.39E-01 |
| PPN            | 8.86E-02 | 7.93E-04 | 2.67E-03 | 7.14E-04 | 1.57E-02 | 4.18E-02 | 1.83E-01 | 3.05E-01 |
| PPQ            | 4.44E-01 | 1.89E-01 | 6.72E-01 | 4.23E-01 | 8.71E-01 | 2.86E-01 | 3.76E-02 | 4.53E-01 |
| PPR            | 2.64E-01 | 3.89E-01 | 6.44E-02 | 1.56E-01 | 8.99E-03 | 2.53E-01 | 6.75E-01 | 4.25E-01 |
| PPS            | 8.38E-01 | 5.08E-01 | 7.27E-02 | 6.62E-02 | 4.53E-01 | 3.58E-01 | 8.93E-01 | 8.38E-01 |
| PPT            | 4.58E-01 | 1.18E-01 | 4.26E-02 | 1.46E-01 | 2.22E-01 | 4.17E-01 | 9.31E-01 | 8.04E-01 |
| PPV            | 8.00E-01 | 5.49E-01 | 7.15E-01 | 2.74E-01 | 4.81E-01 | 5.73E-01 | 9.60E-01 | 6.29E-01 |
| PPW            | 7.00E-01 | 5.57E-01 | 5.75E-01 | 5.68E-01 | 8.69E-01 | 5.27E-01 | 6.09E-01 | 9.54E-01 |
| PPY            | 5.02E-01 | 8.76E-01 | 3.20E-01 | 5.14E-01 | 8.09E-01 | 1.00E+00 | 9.69E-01 | 3.14E-01 |
| (A/D/I)PP(G/N) | 5.24E-05 | 5.20E-09 | 2.70E-09 | 1.30E-09 | 7.01E-07 | 2.65E-06 | 1.05E-01 | 5.81E-01 |
| RME            | 3.44E-01 | 1.69E-02 | 1.04E-02 | 3.49E-02 | 2.28E-01 | 1.01E-01 | 4.00E-02 | 1.04E-01 |
| PPF            | 1.64E-01 | 5.23E-02 | 4.53E-02 | 1.15E-02 | 3.53E-01 | 5.26E-01 | 7.81E-01 | 2.75E-01 |
| GPG            | 4.16E-01 | 2.39E-01 | 1.06E-01 | 1.02E-01 | 8.36E-01 | 3.87E-01 | 5.81E-01 | 8.56E-01 |
| YIR            | 4.49E-01 | 8.39E-01 | 9.21E-01 | 9.66E-01 | 8.64E-01 | 8.54E-01 | 3.19E-01 | 7.63E-01 |

Nonparametric Kruskal–Wallis test was applied to test for protein ratio distribution differences between the PPP (orange), XPP (pink), PPX (blue), and non-diproyl (green) motif subsets and the complete dataset (without the corresponding motif subset) for each strain; corresponding *P* values are listed, with *P* < 0.05 highlighted in red.

## Other Supporting Information Files

[Dataset S1 \(XLSX\)](#)
